# Supplementary material
Source: publisher figshare collection journal article supplement (https://asha.figshare.com/articles/dataset/_/23589648)
Supplement: Supplementary file 1 [file 1]

### Supplemental Material S3. References associated with included studies.

- Baxendale, J., & Hesketh, A. (2003). Comparison of the effectiveness of the Hanen Parent Programme and traditional clinic therapy. *International Journal of Language & Communication Disorders*, 38(4), 397–415. <https://doi.org/10.1080/1368282031000121651>
- Brian, J. A., Smith, I. M., Zwaigenbaum, L., & Bryson, S. E. (2017). Cross-site randomized control trial of the Social ABCs caregiver-mediated intervention for toddlers with autism spectrum disorder: RCT of caregiver-mediated early ASD intervention. *Autism Research*, 10, 1700–1711. <https://doi.org/10.1002/aur.1818>
- Buschmann, A., Jooss, B., Rupp, A., Feldhusen, F., Pietz, J., & Philippi, H. (2009). Parent based language intervention for 2-year-old children with specific expressive language delay: A randomised controlled trial. *Archives of Disease in Childhood*, 94(2), 110–116. <https://doi.org/10.1136/adc.2008.141572>
- Buschmann, A., Multhaus, B., Hasselhorn, M., & Pietz, J. (2015). Long-term effects of a parent-based language intervention on language outcomes and working memory for late-talking toddlers. *Journal of Early Intervention*, 37(3), 175–189. <https://doi.org/10.1177/1053815115609384>
- Byford, S., Cary, M., Barrett, B., Aldred, C. R., Charman, T., Howlin, P., Hudry, K., Leadbitter, K., Le Couteur, A., McConachie, H., Pickles, A., Slonims, V., Temple, K. J., Green, J., & the PACT consortium. (2015). Cost-effectiveness analysis of a communication-focused therapy for pre-school children with autism: Results from a randomised controlled trial. *BMC Psychiatry*, 15(1), 316. <https://doi.org/10.1186/s12888-015-0700-x>
- Carter, A. S., Messinger, D. S., Stone, W. L., Celimli, S., Nahmias, A. S., & Yoder, P. (2011). A randomized controlled trial of Hanen's 'More Than Words' in toddlers with early autism symptoms: Hanen's 'More Than Words' RCT. *Journal of Child Psychology and Psychiatry*, 52(7), 741–752. <https://doi.org/10.1111/j.1469-7610.2011.02395.x>
- Green, J., Charman, T., McConachie, H., Aldred, C., Slonims, V., Howlin, P., Le Couteur, A., Leadbitter, K., Hudry, K., Byford, S., Barrett, B., Temple, K., Macdonald, W., & Pickles, A. (2010). Parent-mediated communication-focused treatment in children with autism (PACT): A randomised controlled trial. *The Lancet*, 375(9732), 2152–2160. [https://doi.org/10.1016/S0140-6736\(10\)60587-9](https://doi.org/10.1016/S0140-6736(10)60587-9)
- Hampton, L. H., Kaiser, A. P., & Fuller, E. A. (2020). Multi-component communication intervention for children with autism: A randomized controlled trial. *Autism*, 24(8), 2104–2116. <https://doi.org/10.1177/1362361320934558>
- Hampton, L. H., Kaiser, A. P., & Roberts, M. Y. (2017). One-year language outcomes in toddlers with language delays: An RCT follow-up. *Pediatrics*, 140(5), e20163646. <https://doi.org/10.1542/peds.2016-3646>
- Kaale, A., Fagerland, M. W., Martinsen, E. W., & Smith, L. (2014). Preschool-based social communication treatment for children with autism: 12-Month follow-up of a randomized trial. *Journal of the American Academy of Child & Adolescent Psychiatry*, 53(2), 188–198. <https://doi.org/10.1016/j.jaac.2013.09.019>
- Kaale, A., Smith, L., & Sponheim, E. (2012). A randomized controlled trial of preschool-based joint attention intervention for children with autism: Preschool-based JA-intervention for children with autism. *Journal of Child Psychology and Psychiatry*, 53(1), 97–105. <https://doi.org/10.1111/j.1469-7610.2011.02450.x>
- Kasari, C., Freeman, S., & Paparella, T. (2006). Joint attention and symbolic play in young children with autism: A randomized controlled intervention study. *Journal of Child Psychology and Psychiatry*, 47(6), 611–620. <https://doi.org/10.1111/j.1469-7610.2005.01567.x>
- Kasari, C., Gulsrud, A., Freeman, S., Paparella, T., & Helleman, G. (2012). Longitudinal follow-up of children with autism receiving targeted interventions on joint attention and play. *Journal*

- of the American Academy of Child & Adolescent Psychiatry*, 51(5), 487–495.  
<https://doi.org/10.1016/j.jaac.2012.02.019>
- Kasari, C., Gulsrud, A., Paparella, T., Hellemann, G., & Berry, K. (2015). Randomized comparative efficacy study of parent-mediated interventions for toddlers with autism. *Journal of Consulting and Clinical Psychology*, 83(3), 554–563. <https://doi.org/10.1037/a0039080>
- Kasari, C., Paparella, T., Freeman, S., & Jahromi, L. B. (2008). Language outcome in autism: Randomized comparison of joint attention and play interventions. *Journal of Consulting and Clinical Psychology*, 76(1), 125–137. <https://doi.org/10.1037/0022-006X.76.1.125>
- Kasari, C., Siller, M., Huynh, L. N., Shih, W., Swanson, M., Hellemann, G. S., & Sugar, C. A. (2014). Randomized controlled trial of parental responsiveness intervention for toddlers at high risk for autism. *Infant Behavior and Development*, 37(4), 711–721.  
<https://doi.org/10.1016/j.infbeh.2014.08.007>
- Kruythoff-Broekman, A., Wiefferink, C., Rieffe, C., & Uilenburg, N. (2019). Parent- implemented early language intervention programme for late talkers: Parental communicative behaviour change and child language outcomes at 3 and 4 years of age. *International Journal of Language & Communication Disorders*, 54(3), 451–464. <https://doi.org/10.1111/1460-6984.12451>
- Landa, R. J., Holman, K. C., O'Neill, A. H., & Stuart, E. A. (2011). Intervention targeting development of socially synchronous engagement in toddlers with autism spectrum disorder: A randomized controlled trial: RCT of social intervention for toddlers with ASD. *Journal of Child Psychology and Psychiatry*, 52(1), 13–21. <https://doi.org/10.1111/j.1469-7610.2010.02288.x>
- McConachie, H., Randle, V., Hammal, D., & Le Couteur, A. (2005). A controlled trial of a training course for parents of children with suspected autism spectrum disorder. *The Journal of Pediatrics*, 147(3), 335–340. <https://doi.org/10.1016/j.jpeds.2005.03.056>
- Motsch, H.-J., & Ulrich, T. (2012). Effects of the strategy therapy 'lexicon pirate' on lexical deficits in preschool age: A randomized controlled trial. *Child Language Teaching and Therapy*, 28(2), 159–175. <https://doi.org/10.1177/0265659011432943>
- Pickles, A., Le Couteur, A., Leadbitter, K., Salomone, E., Cole-Fletcher, R., Tobin, H., Gammer, I., Lowry, J., Vamvakas, G., Byford, S., Aldred, C., Slonims, V., McConachie, H., Howlin, P., Parr, J. R., Charman, T., & Green, J. (2016). Parent-mediated social communication therapy for young children with autism (PACT): Long-term follow-up of a randomised controlled trial. *The Lancet*, 388(10059), 2501–2509. [https://doi.org/10.1016/S0140-6736\(16\)31229-6](https://doi.org/10.1016/S0140-6736(16)31229-6)
- Poslawsky, I. E., Naber, F. B., Bakermans-Kranenburg, M. J., van Daalen, E., van Engeland, H., & van IJzendoorn, M. H. (2015). Video-feedback intervention to promote positive parenting adapted to autism (VIPP-AUTI): A randomized controlled trial. *Autism*, 19(5), 588–603.  
<https://doi.org/10.1177/1362361314537124>
- Roberts, M. Y., & Kaiser, A. P. (2015). Early intervention for toddlers with language delays: A randomized controlled trial. *Pediatrics*, 135(4), 686–693. <https://doi.org/10.1542/peds.2014-2134>
- Schertz, H. H., Odom, S. L., Baggett, K. M., & Sideris, J. H. (2018). Mediating parent learning to promote social communication for toddlers with autism: Effects from a randomized controlled trial. *Journal of Autism and Developmental Disorders*, 48(3), 853–867.  
<https://doi.org/10.1007/s10803-017-3386-8>
- Siller, M., Hutman, T., & Sigman, M. (2013). A parent-mediated intervention to increase responsive parental behaviors and child communication in children with ASD: A randomized clinical trial. *Journal of Autism and Developmental Disorders*, 43(3), 540–555.  
<https://doi.org/10.1007/s10803-012-1584-y>
- Wake, M., Levickis, P., Tobin, S., Gold, L., Ukoumunne, O. C., Goldfeld, S., Zens, N., Le, H. N. D., Law, J., & Reilly, S. (2015). Two-year outcomes of a population-based intervention for

preschool language delay: An RCT. *Pediatrics*, 136(4), e838–e847.  
<https://doi.org/10.1542/peds.2015-1337>

- Wake, M., Levickis, P., Tobin, S., Zens, N., Law, J., Gold, L., Ukoumunne, O. C., Goldfeld, S., Le, H. N. D., Skeat, J., & Reilly, S. (2012). Improving outcomes of preschool language delay in the community: Protocol for the Language for Learning randomised controlled trial. *BMC Pediatrics*, 12(96), 1–11.
- Wake, M., Tobin, S., Levickis, P., Gold, L., Ukoumunne, O. C., Zens, N., Goldfeld, S., Le, H., & Law, J. (2013). Randomized trial of a population-based, home- delivered intervention for preschool language delay. *Pediatrics*, 132(4), 12.
- Ward, S. (1999). An investigation into the effectiveness of an early intervention method for delayed language development in young children. *International Journal of Language & Communication Disorders*, 34(3), 243–264. <https://doi.org/10.1080/136828299247405>
