# Supplementary material
Source: publisher figshare collection journal article supplement (https://asha.figshare.com/articles/dataset/_/23589648)
Supplement: Supplementary file 2 [file 1]

## Supplemental Material S4. Sensitivity analyses for correlations among effects and long-term outcomes.

*Note:*  $g$  represents the average effect size at long-term timepoints.  $\beta$  represents the association of the predictor with long-term outcomes.

Dataset: all data ( $k = 20$ ,  $n = 129$ )

Predictor: none

| Rho       | $g$         | $p$           | CI                |
|-----------|-------------|---------------|-------------------|
| .2        | .275        | .00397        | 0.0998–0.451      |
| .4        | .243        | .00204        | 0.102–0.385       |
| <b>.6</b> | <b>.218</b> | <b>.00167</b> | <b>0.095–0.34</b> |
| .8        | .209        | .00183        | 0.0905–0.327      |

Dataset: all data

Predictor: outcome type

Estimates for prelinguistic outcomes ( $k = 13$ ,  $n = 54$ )

| Rho       | $g$         | $p$              | CI                  |
|-----------|-------------|------------------|---------------------|
| .2        | .412        | < .001           | 0.1948–0.629        |
| .4        | .385        | < .001           | 0.1962–0.574        |
| <b>.6</b> | <b>.355</b> | <b>&lt; .001</b> | <b>0.1180–0.521</b> |
| .8        | .326        | < .001           | 0.1745–0.478        |

Dataset: all data

Predictor: outcome type

Estimates for linguistic outcomes ( $k = 18$ ,  $n = 75$ )

| Rho       | $g$         | $p$         | CI                   |
|-----------|-------------|-------------|----------------------|
| .2        | .189        | .0883       | -0.0312–0.409        |
| .4        | .162        | .0929       | -0.0297–0.353        |
| <b>.6</b> | <b>.138</b> | <b>.101</b> | <b>-0.0296–0.305</b> |
| .8        | .119        | .107        | -0.0291–0.267        |

Dataset: linguistic outcomes

Predictor: etiology of language impairment

Estimates for children with autism ( $k = 11$ ,  $n = 24$ )

| Rho       | $g$          | $p$          | CI                   |
|-----------|--------------|--------------|----------------------|
| .2        | .0323        | .7202        | -0.163–0.228         |
| .4        | .0224        | .7933        | -0.1638–0.209        |
| <b>.6</b> | <b>.0122</b> | <b>.8805</b> | <b>-0.16518–0.19</b> |
| .8        | .00345       | .9651        | -0.0233–0.656        |

Dataset: linguistic outcomes

Predictor: etiology of language impairment

Estimates for children with developmental language disorder ( $k = 7, n = 51$ )

| Rho       | $g$          | $p$          | CI                   |
|-----------|--------------|--------------|----------------------|
| .2        | .4797        | .0676        | -0.048–1.007         |
| .4        | .4196        | .0554        | -0.0136–0.853        |
| <b>.6</b> | <b>.3627</b> | <b>.0519</b> | <b>-0.00426–0.73</b> |
| .8        | .31612       | .0617        | -0.0233–0.656        |

Dataset: prelinguistic outcomes

Predictor: post-test effect sizes

Estimate of association between post-test effects and long-term outcomes ( $k = 11, n = 32$ )

| Rho       | $\beta$     | $p$              | CI                  |
|-----------|-------------|------------------|---------------------|
| .2        | .509        | < .001           | 0.3883–0.629        |
| .4        | .492        | < .001           | 0.3813–0.603        |
| <b>.6</b> | <b>.489</b> | <b>&lt; .001</b> | <b>0.3768–0.602</b> |
| .8        | .488        | < .001           | 0.376–0.600         |

Dataset: linguistic outcomes

Predictor: post-test effect sizes

Estimate of association between post-test effects and long-term outcomes ( $k = 8, n = 26$ )

| Rho       | $\beta$          | $p$         | CI                  |
|-----------|------------------|-------------|---------------------|
| .2        | Did not converge |             |                     |
| .4        | .48433           | .0383       | 0.0558–0.913        |
| <b>.6</b> | <b>.43307</b>    | <b>.044</b> | <b>0.0262–0.840</b> |
| .8        | .3803            | .118        | -0.242–1.002        |

Dataset: prelinguistic outcomes

Predictor: time to follow-up

Estimate of association between post-test effects and time to follow-up ( $k = 12, n = 52$ )

| Rho       | $\beta$        | $p$         | CI                    |
|-----------|----------------|-------------|-----------------------|
| .2        | .00251         | .878        | -0.0359–0.0409        |
| .4        | .00154         | .925        | -0.0366–0.0396        |
| <b>.6</b> | <b>.000878</b> | <b>.957</b> | <b>-0.0380–0.0398</b> |
| .8        | .000211        | .990        | -0.0401–0.0405        |

Dataset: linguistic outcomes

Predictor: time to follow-up

Estimate of association between post-test effects and time to follow-up ( $k = 17, n = 73$ )

| Rho       | $\beta$       | $p$          | CI                     |
|-----------|---------------|--------------|------------------------|
| .2        | -.0166        | .0965        | -0.0393–0.00603        |
| .4        | -.0171        | .0823        | -0.0386–0.00446        |
| <b>.6</b> | <b>-.0176</b> | <b>.0709</b> | <b>-0.0382–0.00308</b> |
| .8        | -.0178        | .0694        | -0.0384–0.00286        |
