# Supplementary material
Source: publisher figshare collection journal article supplement (https://asha.figshare.com/articles/dataset/_/23589648)

**Supplemental Material S5.** Funnel plots: all effects, prelinguistic effects, and linguistic effects.

*Funnel Plot for All Effects*

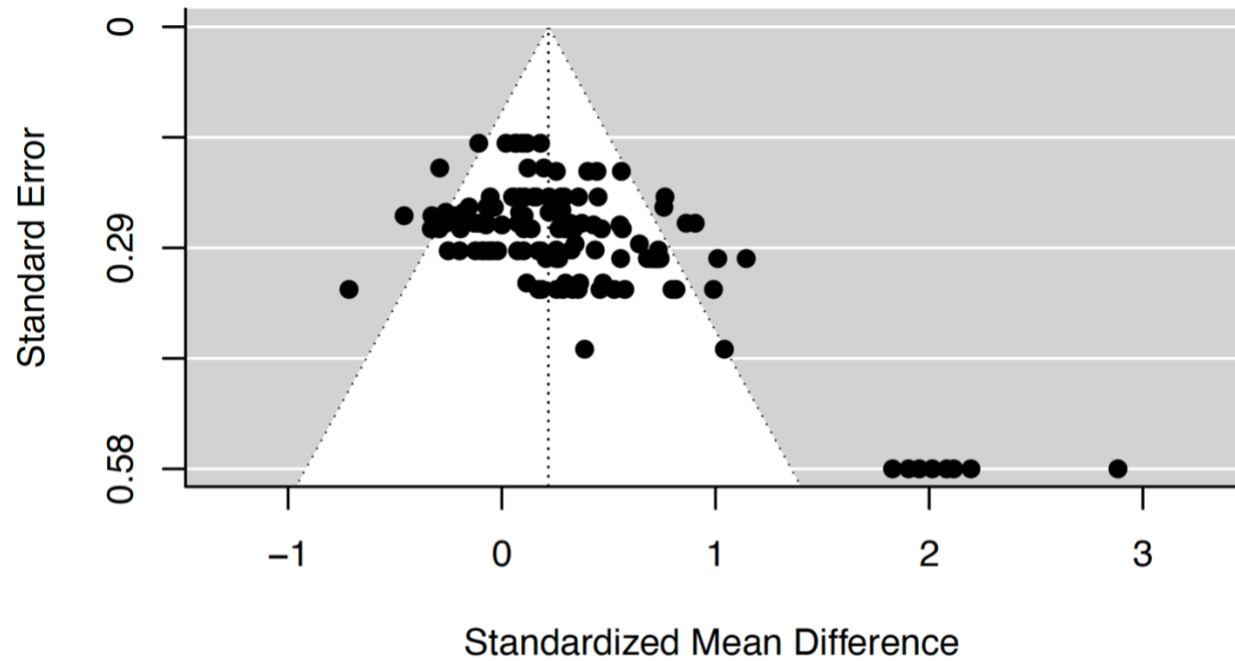

*Funnel Plot for Prelinguistic Effects*

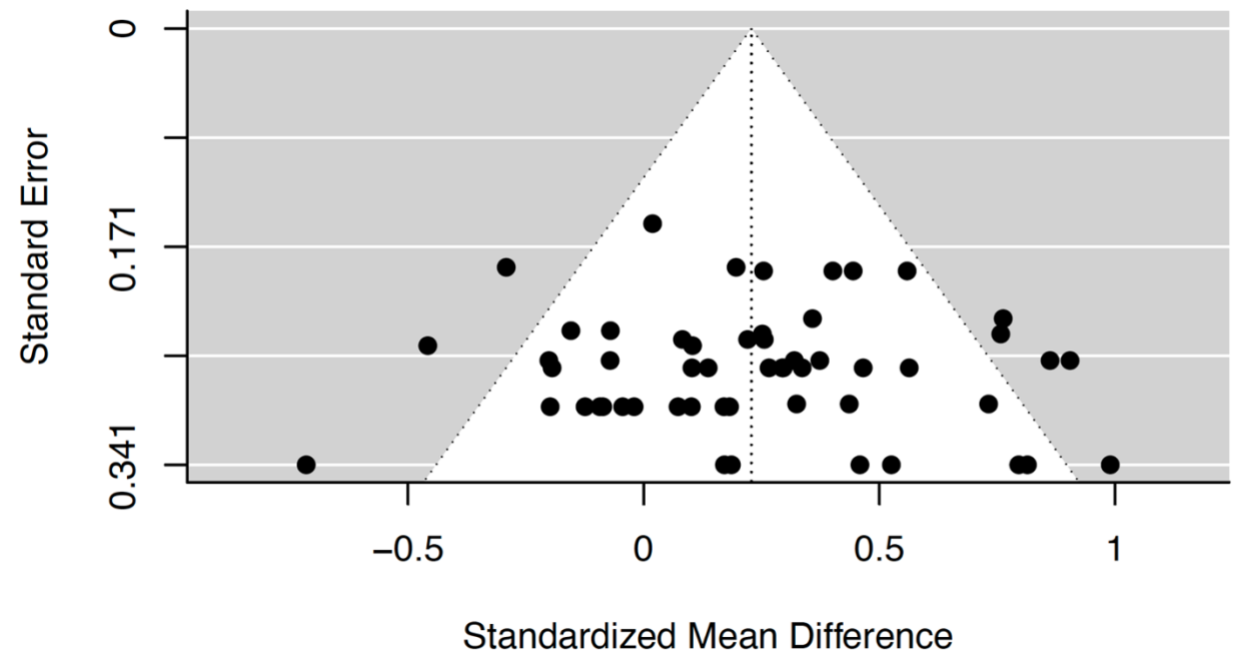

Funnel Plot for Linguistic Effects

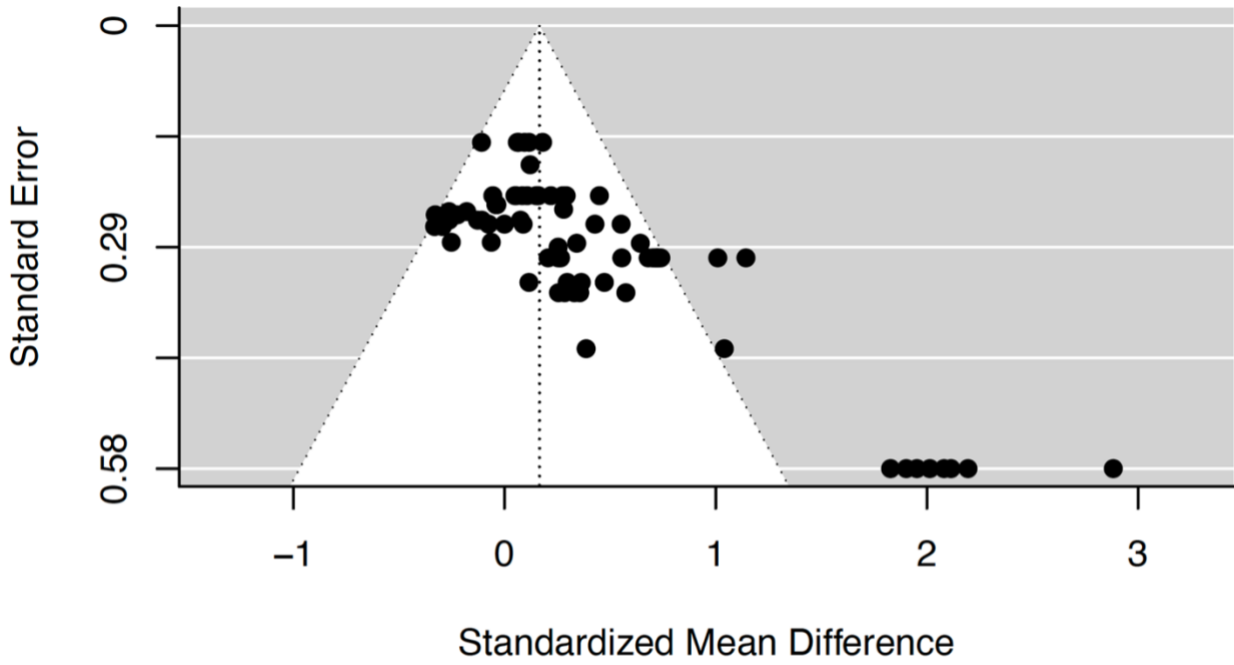

Supplement: Supplementary file 4 [file 1]
